# Supplementary material
Source: Research Square preprint supplement (doi:10.21203/rs.3.rs-9475542/v1)
Supplement: Supplementary file 1 [file 1da3de32db72f2f5ae085783.docx]

**Appendix: Tables**

**Appendix Table 1: Differential abundance tables**

| **Control** | | | | | |
| --- | --- | --- | --- | --- | --- |
| **logFC** | **pval.adj** | **B** | **ordering** | **Feature** | **Method** |
| -0.0055693 | 1.46E-08 | 11.9548609 | Plaque_Control>Tissues_Control | k__Bacteria; p__Bacillota; c__Bacilli; o__Lactobacillales; f__Enterococcaceae; g__Enterococcus; s__italicus | Log LIMMA (lli) |
| 0.00313323 | 1.88E-04 | 1.82648177 | Tissues_Control>Plaque_Control | k__Bacteria; p__Bacteroidota; c__Bacteroidia; o__Bacteroidales; f__Prevotellaceae; g__Segatella; s__sp. | Log LIMMA (lli) |
| -0.0031454 | 1.88E-04 | 1.45212702 | Plaque_Control>Tissues_Control | k__Bacteria; p__Bacillota; c__Clostridia; o__Peptostreptococcales; f__Peptostreptococcaceae; g__Peptostreptococcus; s__stomatis | Log LIMMA (lli) |
| 0.0026452 | 1.92E-04 | 1.14919851 | Tissues_Control>Plaque_Control | k__Bacteria; p__Bacteroidota; c__Flavobacteriia; o__Flavobacteriales; f__Flavobacteriaceae; g__Capnocytophaga; s__ochracea | Log LIMMA (lli) |
| -0.0037593 | 2.54E-04 | 0.65486965 | Plaque_Control>Tissues_Control | k__Bacteria; p__Bacillota; c__Bacilli; o__Lactobacillales; f__Streptococcaceae; g__Streptococcus; s__intermediuss__intermedius | Log LIMMA (lli) |
| -0.0036107 | 4.63E-04 | -0.1106112 | Plaque_Control>Tissues_Control | k__Bacteria; p__Bacillota; c__Bacilli; o__Lactobacillales; f__Streptococcaceae; g__Streptococcus; s__salivarius | Log LIMMA (lli) |
| -0.002701 | 0.00195463 | -1.6633083 | Plaque_Control>Tissues_Control | k__Bacteria; p__Bacillota; c__Bacilli; o__Lactobacillales; f__Streptococcaceae; g__Streptococcus; s__sp. | Log LIMMA (lli) |
| 0.00219601 | 0.00220712 | -1.9103068 | Tissues_Control>Plaque_Control | k__Bacteria; p__Spirochaetota; c__Spirochaetia; o__Spirochaetales; f__Treponemataceae; g__Treponema; s__socranskii | Log LIMMA (lli) |
| -0.0036375 | 0.00258956 | -2.1787088 | Plaque_Control>Tissues_Control | k__Bacteria; p__Bacillota; c__Bacilli; o__Lactobacillales; f__Streptococcaceae; g__Streptococcus; s__cristatuss__cristatus | Log LIMMA (lli) |
| -0.0022097 | 0.00491523 | -2.8976746 | Plaque_Control>Tissues_Control | k__Bacteria; p__Actinomycetota; c__Actinomycetes; o__Actinomycetales; f__Actinomycetaceae; g__Actinomyces; s__johnsonii | Log LIMMA (lli) |
| -0.0029157 | 0.00676734 | -3.2957895 | Plaque_Control>Tissues_Control | k__Bacteria; p__Bacillota; c__Bacilli; o__Lactobacillales; f__Streptococcaceae; g__Streptococcus; s__mitiss__mitiss__mitis | Log LIMMA (lli) |
| -0.0029993 | 0.0095093 | -3.7242065 | Plaque_Control>Tissues_Control | k__Bacteria; p__Bacillota; c__Bacilli; o__Lactobacillales; f__Streptococcaceae; g__Streptococcus; s__mitiss__mitiss__mitiss__mitiss__pseudopneumoniaes__pseudopneumoniaes__pseudopneumoniae | Log LIMMA (lli) |
| 0.00193832 | 0.0095093 | -3.7802731 | Tissues_Control>Plaque_Control | k__Bacteria; p__Actinomycetota; c__Actinomycetes; o__Mycobacteriales; f__Corynebacteriaceae; g__Corynebacterium; s__matruchotii | Log LIMMA (lli) |
| -0.0025076 | 0.01638975 | -4.367638 | Plaque_Control>Tissues_Control | k__Bacteria; p__Bacillota; c__Bacilli; o__Lactobacillales; f__Streptococcaceae; g__Streptococcus; s__oraliss__oraliss__oraliss__oralis | Log LIMMA (lli) |
| -0.002062 | 0.01915242 | -4.5800433 | Plaque_Control>Tissues_Control | k__Bacteria; p__Bacillota; c__Bacilli; o__Caryophanales; f__Gemellaceae; g__Gemella; s__haemolysanss__sanguinis | Log LIMMA (lli) |
| 0.00172367 | 0.02543685 | -5.0035242 | Tissues_Control>Plaque_Control | k__Bacteria; p__Bacillota; c__Negativicutes; o__Selenomonadales; f__Selenomonadaceae; g__Selenomonas; s__sputigena | Log LIMMA (lli) |
| -0.0019276 | 0.02543685 | -5.0158977 | Plaque_Control>Tissues_Control | k__Bacteria; p__Actinomycetota; c__Actinomycetes; o__Actinomycetales; f__Actinomycetaceae; g__Actinomyces; s__naeslundii | Log LIMMA (lli) |
| 0.00228523 | 0.02543685 | -5.0184839 | Tissues_Control>Plaque_Control | k__Bacteria; p__Bacteroidota; c__Flavobacteriia; o__Flavobacteriales; f__Flavobacteriaceae; g__Capnocytophaga; s__gingivalis | Log LIMMA (lli) |
| 0.0018587 | 0.03748047 | -5.4311421 | Tissues_Control>Plaque_Control | k__Bacteria; p__Bacillota; c__Negativicutes; o__Selenomonadales; f__Selenomonadaceae; g__Selenomonas; s__sp. | Log LIMMA (lli) |
| -0.0021798 | 0.03796449 | -5.4907984 | Plaque_Control>Tissues_Control | k__Bacteria; p__Bacillota; c__Bacilli; o__Lactobacillales; f__Streptococcaceae; g__Streptococcus; s__oraliss__oraliss__oralis | Log LIMMA (lli) |
| -0.0018746 | 0.03981054 | -5.580232 | Plaque_Control>Tissues_Control | k__Bacteria; p__Bacillota; c__Bacilli; o__Lactobacillales; f__Streptococcaceae; g__Streptococcus; s__mitiss__mitis | Log LIMMA (lli) |
| -0.0017261 | 0.04697363 | -5.8176918 | Plaque_Control>Tissues_Control | k__Bacteria; p__Bacillota; c__Bacilli; o__Lactobacillales; f__Streptococcaceae; g__Streptococcus; s__sanguiniss__sanguiniss__sanguiniss__sanguiniss__sanguiniss__sanguinis | Log LIMMA (lli) |
| -0.0019382 | 0.04697363 | -5.841959 | Plaque_Control>Tissues_Control | k__Bacteria; p__Bacillota; c__Bacilli; o__Lactobacillales; f__Streptococcaceae; g__Streptococcus; s__cristatus | Log LIMMA (lli) |
| 0.0014297 | 0.04697363 | -5.8569423 | Tissues_Control>Plaque_Control | k__Bacteria; p__Fusobacteriota; c__Fusobacteriia; o__Fusobacteriales; f__Fusobacteriaceae; g__Fusobacterium; s__polymorphums__polymorphum | Log LIMMA (lli) |
| -0.0020312 | 0.04783406 | -5.9345037 | Plaque_Control>Tissues_Control | k__Bacteria; p__Bacillota; c__Bacilli; o__Lactobacillales; f__Streptococcaceae; g__Streptococcus; s__oralis | Log LIMMA (lli) |
| 0.00212141 | 0.04783406 | -5.9474561 | Tissues_Control>Plaque_Control | k__Bacteria; p__Bacteroidota; c__Bacteroidia; o__Bacteroidales; f__Prevotellaceae; g__Prevotella; s__denticola | Log LIMMA (lli) |

| **Day 7** | | | | | |
| --- | --- | --- | --- | --- | --- |
| **logFC** | **pval.adj** | **B** | **ordering** | **Feature** | **Method** |
| -0.00496 | 3.22E-06 | 6.77486914 | Plaque_Day7>Tissues_Day7 | k__Bacteria; p__Bacillota; c__Bacilli; o__Lactobacillales; f__Streptococcaceae; g__Streptococcus; s__parasanguiniss__parasanguiniss__parasanguiniss__parasanguiniss__parasanguinis | Log LIMMA (lli) |
| 0.00355269 | 0.00109887 | 0.33944698 | Tissues_Day7>Plaque_Day7 | k__Bacteria; p__Actinomycetota; c__Actinomycetes; o__Mycobacteriales; f__Corynebacteriaceae; g__Corynebacterium; s__matruchotii | Log LIMMA (lli) |
| -0.0033443 | 0.0053962 | -1.7393597 | Plaque_Day7>Tissues_Day7 | k__Bacteria; p__Bacillota; c__Bacilli; o__Lactobacillales; f__Streptococcaceae; g__Streptococcus; s__salivarius | Log LIMMA (lli) |
| -0.0035155 | 0.0053962 | -1.8794207 | Plaque_Day7>Tissues_Day7 | k__Bacteria; p__Bacillota; c__Bacilli; o__Lactobacillales; f__Streptococcaceae; g__Streptococcus; s__intermediuss__intermedius | Log LIMMA (lli) |
| -0.0032031 | 0.00964908 | -2.8223904 | Plaque_Day7>Tissues_Day7 | k__Bacteria; p__Bacillota; c__Bacilli; o__Lactobacillales; f__Streptococcaceae; g__Streptococcus; s__mitiss__mitiss__mitiss__mitiss__pseudopneumoniaes__pseudopneumoniaes__pseudopneumoniae | Log LIMMA (lli) |
| 0.00314045 | 0.00964908 | -2.8281915 | Tissues_Day7>Plaque_Day7 | k__Bacteria; p__Pseudomonadota; c__Betaproteobacteria; o__Neisseriales; f__Neisseriaceae; g__Eikenella; s__corrodens | Log LIMMA (lli) |
| -0.0024834 | 0.01003774 | -3.0135441 | Plaque_Day7>Tissues_Day7 | k__Bacteria; p__Patescibacteria; c__Saccharimonadia; o__Saccharimonadales; f__Saccharimonadaceae; g__Saccharimonas; s__sp. | Log LIMMA (lli) |
| -0.0027442 | 0.01130717 | -3.3635622 | Plaque_Day7>Tissues_Day7 | k__Bacteria; p__Bacillota; c__Clostridia; o__Peptostreptococcales; f__Peptostreptococcaceae; g__Peptostreptococcus; s__stomatis | Log LIMMA (lli) |
| 0.0027335 | 0.01130717 | -3.3672081 | Tissues_Day7>Plaque_Day7 | k__Bacteria; p__Actinomycetota; c__Actinomycetes; o__Micrococcales; f__Micrococcaceae; g__Rothia; s__dentocariosas__dentocariosas__dentocariosas__dentocariosas__dentocariosas__dentocariosa | Log LIMMA (lli) |
| -0.0025824 | 0.01625878 | -3.8127761 | Plaque_Day7>Tissues_Day7 | k__Bacteria; p__Bacillota; c__Negativicutes; o__Veillonellales; f__Veillonellaceae; g__Veillonella; s__atypicas__nakazawae | Log LIMMA (lli) |
| -0.0028673 | 0.01991607 | -4.0951821 | Plaque_Day7>Tissues_Day7 | k__Bacteria; p__Bacillota; c__Bacilli; o__Lactobacillales; f__Streptococcaceae; g__Streptococcus; s__mitiss__mitiss__mitis | Log LIMMA (lli) |
| -0.0024402 | 0.02298898 | -4.3127884 | Plaque_Day7>Tissues_Day7 | k__Bacteria; p__Bacillota; c__Clostridia; o__Lachnospirales; f__Lachnospiraceae; g__Lachnoanaerobaculum; s__saburreum | Log LIMMA (lli) |
| 0.00264723 | 0.03115086 | -4.6737442 | Tissues_Day7>Plaque_Day7 | k__Bacteria; p__Pseudomonadota; c__Betaproteobacteria; o__Neisseriales; f__Neisseriaceae; g__Neisseria; s__oralis | Log LIMMA (lli) |
| -0.0025163 | 0.04720483 | -5.1595238 | Plaque_Day7>Tissues_Day7 | k__Bacteria; p__Actinomycetota; c__Actinomycetes; o__Actinomycetales; f__Actinomycetaceae; g__Actinomyces; s__oriss__oris | Log LIMMA (lli) |
| 0.00223034 | 0.04720483 | -5.195515 | Tissues_Day7>Plaque_Day7 | k__Bacteria; p__Fusobacteriota; c__Fusobacteriia; o__Fusobacteriales; f__Leptotrichiaceae; g__Pseudoleptotrichia; s__sp. | Log LIMMA (lli) |

| **Day 14** | | | | | |
| --- | --- | --- | --- | --- | --- |
| **logFC** | **pval.adj** | **B** | **ordering** | **Feature** | **Method** |
| -0.0066155 | 6.77E-13 | 22.0464477 | Plaque_Day14>Tissues_Day14 | k__Bacteria; p__Bacillota; c__Bacilli; o__Lactobacillales; f__Enterococcaceae; g__Enterococcus; s__italicus | Log LIMMA (lli) |
| -0.0038732 | 8.77E-05 | 2.72857697 | Plaque_Day14>Tissues_Day14 | k__Bacteria; p__Bacillota; c__Bacilli; o__Lactobacillales; f__Streptococcaceae; g__Streptococcus; s__salivarius | Log LIMMA (lli) |
| -0.0039161 | 1.33E-04 | 1.92446299 | Plaque_Day14>Tissues_Day14 | k__Bacteria; p__Bacillota; c__Bacilli; o__Lactobacillales; f__Streptococcaceae; g__Streptococcus; s__mitiss__mitiss__mitis | Log LIMMA (lli) |
| -0.0040138 | 1.88E-04 | 1.30271407 | Plaque_Day14>Tissues_Day14 | k__Bacteria; p__Bacillota; c__Bacilli; o__Lactobacillales; f__Streptococcaceae; g__Streptococcus; s__intermediuss__intermedius | Log LIMMA (lli) |
| -0.0037776 | 3.32E-04 | 0.52673782 | Plaque_Day14>Tissues_Day14 | k__Bacteria; p__Bacillota; c__Bacilli; o__Lactobacillales; f__Streptococcaceae; g__Streptococcus; s__mitiss__mitiss__mitiss__mitiss__pseudopneumoniaes__pseudopneumoniaes__pseudopneumoniae | Log LIMMA (lli) |
| 0.00328574 | 4.22E-04 | 0.11528801 | Tissues_Day14>Plaque_Day14 | k__Bacteria; p__Bacteroidota; c__Bacteroidia; o__Bacteroidales; f__Prevotellaceae; g__Segatella; s__sp. | Log LIMMA (lli) |
| -0.0025328 | 0.00130889 | -1.134213 | Plaque_Day14>Tissues_Day14 | k__Bacteria; p__Actinomycetota; c__Actinomycetes; o__Actinomycetales; f__Actinomycetaceae; g__Actinomyces; s__johnsonii | Log LIMMA (lli) |
| 0.00278526 | 0.00184381 | -1.6284313 | Tissues_Day14>Plaque_Day14 | k__Bacteria; p__Bacteroidota; c__Flavobacteriia; o__Flavobacteriales; f__Flavobacteriaceae; g__Capnocytophaga; s__ochracea | Log LIMMA (lli) |
| 0.00285705 | 0.00184381 | -1.7082651 | Tissues_Day14>Plaque_Day14 | k__Bacteria; p__Pseudomonadota; c__Betaproteobacteria; o__Neisseriales; f__Neisseriaceae; g__Eikenella; s__corrodens | Log LIMMA (lli) |
| -0.0033315 | 0.00241874 | -2.0713262 | Plaque_Day14>Tissues_Day14 | k__Bacteria; p__Bacillota; c__Bacilli; o__Lactobacillales; f__Streptococcaceae; g__Streptococcus; s__cristatuss__cristatus | Log LIMMA (lli) |
| -0.0025288 | 0.01066106 | -3.5814994 | Plaque_Day14>Tissues_Day14 | k__Bacteria; p__Actinomycetota; c__Actinomycetes; o__Actinomycetales; f__Actinomycetaceae; g__Schaalia; s__georgiaes__georgiae | Log LIMMA (lli) |
| -0.0029632 | 0.01223254 | -3.7945537 | Plaque_Day14>Tissues_Day14 | k__Bacteria; p__Bacillota; c__Bacilli; o__Lactobacillales; f__Streptococcaceae; g__Streptococcus; s__intermediuss__intermediuss__intermediuss__intermedius | Log LIMMA (lli) |
| 0.00227558 | 0.01832568 | -4.25232 | Tissues_Day14>Plaque_Day14 | k__Bacteria; p__Bacteroidota; c__Bacteroidia; o__Bacteroidales; f__Prevotellaceae; g__Segatella; s__oulorums__oulorum | Log LIMMA (lli) |
| -0.0020554 | 0.01952108 | -4.4999951 | Plaque_Day14>Tissues_Day14 | k__Bacteria; p__Patescibacteria; c__Saccharimonadia; o__Saccharimonadales; f__Saccharimonadaceae; g__Saccharimonas; s__sp. | Log LIMMA (lli) |
| -0.0028068 | 0.01952108 | -4.5037608 | Plaque_Day14>Tissues_Day14 | k__Bacteria; p__Bacillota; c__Bacilli; o__Lactobacillales; f__Streptococcaceae; g__Streptococcus; s__sanguiniss__sanguiniss__sanguiniss__sanguinis | Log LIMMA (lli) |
| -0.0021644 | 0.01952108 | -4.5452728 | Plaque_Day14>Tissues_Day14 | k__Bacteria; p__Patescibacteria; c__Saccharimonadia; o__Saccharimonadales; f__Parvisynbacteraceae; g__Parvisynbacter; s__sp.s__sp. | Log LIMMA (lli) |
| 0.0023597 | 0.01952108 | -4.5641192 | Tissues_Day14>Plaque_Day14 | k__Bacteria; p__Bacteroidota; c__Flavobacteriia; o__Flavobacteriales; f__Flavobacteriaceae; g__Capnocytophaga; s__granulosas__granulosa | Log LIMMA (lli) |
| 0.00254322 | 0.02878881 | -4.9811216 | Tissues_Day14>Plaque_Day14 | k__Bacteria; p__Fusobacteriota; c__Fusobacteriia; o__Fusobacteriales; f__Leptotrichiaceae; g__Leptotrichia; s__hongkongensiss__hongkongensis | Log LIMMA (lli) |
| 0.00206482 | 0.04201275 | -5.4117377 | Tissues_Day14>Plaque_Day14 | k__Bacteria; p__Pseudomonadota; c__Gammaproteobacteria; o__Cardiobacteriales; f__Cardiobacteriaceae; g__Cardiobacterium; s__hominis | Log LIMMA (lli) |
| 0.00183372 | 0.04201275 | -5.4301154 | Tissues_Day14>Plaque_Day14 | k__Bacteria; p__Bacteroidota; c__Flavobacteriia; o__Flavobacteriales; f__Weeksellaceae; g__Riemerella; s__sp. | Log LIMMA (lli) |
| -0.001966 | 0.04591211 | -5.5571842 | Plaque_Day14>Tissues_Day14 | k__Bacteria; p__Bacillota; c__Clostridia; o__Lachnospirales; f__Lachnospiraceae; g__Lachnoanaerobaculum; s__sp.s__sp. | Log LIMMA (lli) |

| **Day 21** | | | | | |
| --- | --- | --- | --- | --- | --- |
| **logFC** | **pval.adj** | **B** | **ordering** | **Feature** | **Method** |
| -0.006266 | 1.31E-11 | 19.1247372 | Plaque_Day21>Tissues_Day21 | k__Bacteria; p__Bacillota; c__Bacilli; o__Lactobacillales; f__Enterococcaceae; g__Enterococcus; s__italicus | Log LIMMA (lli) |
| 0.00634088 | 2.83E-07 | 8.44136649 | Tissues_Day21>Plaque_Day21 | k__Bacteria; p__Pseudomonadota; c__Betaproteobacteria; o__Burkholderiales; f__Burkholderiaceae; g__Ralstonia; s__pickettii | Log LIMMA (lli) |
| -0.004254 | 1.05E-04 | 2.18107207 | Plaque_Day21>Tissues_Day21 | k__Bacteria; p__Bacillota; c__Bacilli; o__Lactobacillales; f__Streptococcaceae; g__Streptococcus; s__intermediuss__intermedius | Log LIMMA (lli) |
| -0.0038733 | 2.95E-04 | 0.88609997 | Plaque_Day21>Tissues_Day21 | k__Bacteria; p__Bacillota; c__Bacilli; o__Lactobacillales; f__Streptococcaceae; g__Streptococcus; s__salivarius | Log LIMMA (lli) |
| 0.00468687 | 2.98E-04 | 0.61569706 | Tissues_Day21>Plaque_Day21 | k__Bacteria; p__Pseudomonadota; c__Gammaproteobacteria; o__Pseudomonadales; f__Pseudomonadaceae; g__Pseudomonas; s__fluorescens | Log LIMMA (lli) |
| -0.0028754 | 2.98E-04 | 0.48160835 | Plaque_Day21>Tissues_Day21 | k__Bacteria; p__Actinomycetota; c__Actinomycetes; o__Actinomycetales; f__Actinomycetaceae; g__Actinomyces; s__johnsonii | Log LIMMA (lli) |
| 0.0034068 | 0.00392193 | -2.1696614 | Tissues_Day21>Plaque_Day21 | k__Bacteria; p__Bacteroidota; c__Bacteroidia; o__Bacteroidales; f__Prevotellaceae; g__Segatella; s__sp. | Log LIMMA (lli) |
| -0.0026242 | 0.009642 | -3.160502 | Plaque_Day21>Tissues_Day21 | k__Bacteria; p__Bacillota; c__Clostridia; o__Lachnospirales; f__Lachnospiraceae; g__Lachnoanaerobaculum; s__saburreum | Log LIMMA (lli) |
| 0.00244473 | 0.01292151 | -3.5518606 | Tissues_Day21>Plaque_Day21 | k__Bacteria; p__Bacteroidota; c__Bacteroidia; o__Bacteroidales; f__Prevotellaceae; g__Segatella; s__oris | Log LIMMA (lli) |
| -0.0019382 | 0.01772907 | -3.9521626 | Plaque_Day21>Tissues_Day21 | k__Bacteria; p__Bacillota; c__Bacilli; o__Caryophanales; f__Gemellaceae; g__Gemella; s__morbillorum | Log LIMMA (lli) |
| 0.00236062 | 0.02014321 | -4.1630876 | Tissues_Day21>Plaque_Day21 | k__Bacteria; p__Bacillota; c__Negativicutes; o__Selenomonadales; f__Selenomonadaceae; g__Selenomonas; s__sputigena | Log LIMMA (lli) |
| -0.0022029 | 0.02900349 | -4.5884964 | Plaque_Day21>Tissues_Day21 | k__Bacteria; p__Bacillota; c__Bacilli; o__Lactobacillales; f__Carnobacteriaceae; g__Granulicatella; s__adiacens | Log LIMMA (lli) |
| -0.0019408 | 0.04656103 | -5.10622 | Plaque_Day21>Tissues_Day21 | k__Bacteria; p__Bacillota; c__Bacilli; o__Caryophanales; f__Gemellaceae; g__Gemella; s__haemolysanss__sanguinis | Log LIMMA (lli) |
| 0.0025689 | 0.04671736 | -5.2257375 | Tissues_Day21>Plaque_Day21 | k__Bacteria; p__Fusobacteriota; c__Fusobacteriia; o__Fusobacteriales; f__Fusobacteriaceae; g__Fusobacterium; s__animaliss__animaliss__animaliss__animaliss__animaliss__animaliss__animaliss__animaliss__animaliss__animaliss__animaliss__animaliss__animaliss__animaliss__animaliss__animaliss__animaliss__animaliss__animaliss__animaliss__animaliss__animaliss__animaliss__animaliss__animaliss__animaliss__animaliss__animaliss__animaliss__animaliss__animaliss__animaliss__animaliss__animaliss__animaliss__animaliss__animalis | Log LIMMA (lli) |
| -0.0019665 | 0.04671736 | -5.2424826 | Plaque_Day21>Tissues_Day21 | k__Bacteria; p__Bacillota; c__Bacilli; o__Lactobacillales; f__Streptococcaceae; g__Streptococcus; s__infantis | Log LIMMA (lli) |
| -0.0023596 | 0.04845054 | -5.3362241 | Plaque_Day21>Tissues_Day21 | k__Bacteria; p__Bacillota; c__Bacilli; o__Lactobacillales; f__Streptococcaceae; g__Streptococcus; s__cristatuss__cristatus | Log LIMMA (lli) |

**Supplementary Table 1. Complete differential abundance results for plaque versus gingival tissue bacteriomes across all experimental gingivitis timepoints.**

Differentially abundant bacterial taxa between subgingival plaque and gingival tissue were identified independently at each study timepoint — Control (Day 0), Day 7, Day 14, and Day 21 — using log-transformed LIMMA (log-LIMMA; lli), selected on the basis of spike-in benchmark testing within the FALAPhyl pipeline. Each row represents a single differentially abundant amplicon sequence variant (ASV) resolved to the lowest assignable taxonomic level. Columns report: logFC, the log fold-change in relative abundance between the two niches (negative values indicate enrichment in plaque; positive values indicate enrichment in gingival tissue); pval.adj, the Benjamini–Hochberg false discovery rate (FDR)-adjusted p-value; B, the log-odds that the taxon is differentially abundant (empirical Bayes B-statistic); ordering, the direction of enrichment expressed as Plaque > Tissue or Tissue > Plaque; Feature, the full taxonomic lineage of the ASV from kingdom to species level using standard QIIME2/SILVA notation; and Method, the statistical approach applied. Only taxa meeting the significance threshold of FDR-adjusted p < 0.05 are reported. Taxa are ranked within each timepoint by decreasing B-statistic (i.e., decreasing posterior confidence of differential abundance). Across all timepoints, plaque was consistently enriched for health-associated early colonizers, including multiple *Streptococcus species (S. salivarius, S. intermedius, S. mitis, S. cristatus, S. oralis, S. sanguinis, S. parasanguinis), Actinomyces spp. (A. johnsonii, A. naeslundii, A. oris), Gemella spp., Peptostreptococcus stomatis, Veillonella spp., Lachnoanaerobaculum spp., Saccharimonas spp., and Granulicatella adiacens. Enterococcus italicus* showed the strongest and most consistent plaque enrichment across timepoints (logFC range −0.0055 to −0.0066; FDR p = 1.46×10⁻⁸ to 1.31×10⁻¹¹). Gingival tissue was consistently enriched for taxa associated with subgingival, anaerobic, and periodontal-associated consortia, including *Segatella spp., Capnocytophaga ochracea, Capnocytophaga gingivalis, Capnocytophaga granulosa, Corynebacterium matruchotii, Eikenella corrodens, Treponema socranskii, Selenomonas sputigena, Fusobacterium polymorphum, Fusobacterium animalis, Leptotrichia hongkongensis, Pseudoleptotrichia spp., Cardiobacterium hominis, and Prevotella denticola*. The directional consistency of these niche-specific signatures across all four timepoints supports selective ecological structuring of the tissue bacteriome throughout the experimental gingivitis induction period. *Ralstonia pickettii* and *Pseudomonas fluorescens*, both enriched in tissue at Day 21, are recognized environmental contaminants commonly associated with low-biomass sequencing workflows and reagent kits; their biological significance in this context cannot be confirmed without further validation.
